# Supplementary material for: Graphitic carbon nitride embedded-Ag nanoparticle decorated-ZnWO4 nanocomposite-based photoluminescence sensing of Hg2+
Source: Royal Society of Chemistry journal article supplement (doi:10.1039/d1ma00211b), 2021-01-01
Supplement: d1ma00211b1.pdf [file d1ma00211b1.pdf]

## Supporting Information

### **Graphitic carbon nitride embedded-Ag nanoparticle decorated-ZnWO<sub>4</sub> nanocomposite based photoluminescence sensing of Hg<sup>2+</sup>**

**Uday Kumar Ghorui<sup>†</sup>, Jit Satra<sup>†</sup>, Papri Mondal<sup>†</sup>, Sourav Mardanya<sup>†</sup>, Arpita Sarkar<sup>†</sup>,  
Divesh N. Srivastava<sup>‡</sup>, Bibhutosh Adhikary<sup>†\*</sup> and Anup Mondal<sup>†\*</sup>**

<sup>†</sup>Department of Chemistry, Indian Institute of Engineering Science and Technology, Shibpur, Howrah-711103, West Bengal, India.

<sup>‡</sup>Department of Analytical Science, Central Salt, and Marine Chemicals Research Institute, Gijubhai, Badheka Marg, Bhavnagar 364002, Gujarat, India

#### **Corresponding Authors**

\*Email: [bibhutosh@chem.iiests.ac.in](mailto:bibhutosh@chem.iiests.ac.in), [bibhutoshadhikary@gmail.com](mailto:bibhutoshadhikary@gmail.com) Mob: +918902524532

\*Email: [anupmondal2000@yahoo.co.in](mailto:anupmondal2000@yahoo.co.in), [anup@chem.iiests.ac.in](mailto:anup@chem.iiests.ac.in) Mob: +919681420714

---

**Materials:** Zinc nitrate hexahydrate ( $\text{Zn}(\text{NO}_3)_2 \cdot 6\text{H}_2\text{O}$ ), sodium tungstate dihydrate ( $\text{Na}_2\text{WO}_4 \cdot 2\text{H}_2\text{O}$ ), liquid ammonia ( $\text{NH}_3$ ), melamine powder, sulfuric acid ( $\text{H}_2\text{SO}_4$ ), nitric acid ( $\text{HNO}_3$ ), tri-sodium citrate, cobaltous chloride ( $\text{CoCl}_2$ ), calcium chloride ( $\text{CaCl}_2$ ), cadmium chloride ( $\text{CdCl}_2$ ), cupric chloride ( $\text{CuCl}_2$ ), ferric chloride ( $\text{FeCl}_3$ ), manganous chloride ( $\text{MnCl}_2$ ), potassium chloride ( $\text{KCl}$ ), lead chloride ( $\text{PbCl}_2$ ) and nickel(II) chloride ( $\text{NiCl}_2$ ) were purchased from Merck Specialties Private Limited, India. All the chemicals were used as purchased and without further purification. Mili-Q water was used for all experiments unless mentioned otherwise. Silver nitrate ( $\text{AgNO}_3$ , 99%), mercuric chloride ( $\text{HgCl}_2$ ), and sodium borohydride ( $\text{NaBH}_4$ ) were purchased from Sigma–Aldrich.

**Synthesis of g- $\text{C}_3\text{N}_4/\text{Ag}/\text{ZnWO}_4$  nanocomposite:**  $\text{ZnWO}_4$  nanorods were prepared by a simple hydrothermal method according to the earlier report.<sup>1</sup> In brief, 1mmol each of zinc nitrate hexahydrate ( $\text{Zn}(\text{NO}_3)_2 \cdot 6\text{H}_2\text{O}$ ) and sodium tungstate dihydrate ( $\text{Na}_2\text{WO}_4 \cdot 2\text{H}_2\text{O}$ ) were dissolved in 20 ml 1:4 ammonia-water solution in two separate beakers. Then, the clear  $\text{Na}_2\text{WO}_4$  solution was added drop-wise to  $\text{Zn}(\text{NO}_3)_2$  solution and stirred vigorously at room temperature for 30 min maintaining a pH of 10.0 by adding  $\text{NH}_4\text{OH}$ . The white slurry as obtained from the mixture of the solutions was transferred to 50 ml Teflon-lined autoclave and maintained at 180 °C for 12 h. The autoclave was then cooled to room temperature naturally and the as-prepared sample was separated by centrifugation and washed with Mili-Q water, followed by anhydrous ethanol. The white sample was then dried at 60 °C for 6 h.

To synthesize bulk g- $\text{C}_3\text{N}_4$ , 7.5 g of melamine powder was kept into a porcelain boat with a cover and heated to 600 °C in a muffle furnace for 6 h with a heating rate of 3°C min<sup>-1</sup>. The obtained yellow product was then ground to a fine powder for further processing and characterization.

To synthesize the g- $\text{C}_3\text{N}_4/\text{ZnWO}_4$  nanocomposite, the following procedure was carried out. At first, the as-prepared  $\text{ZnWO}_4$  nanorods were dispersed in 20 ml Mili-Q water in an ultrasonic bath for about 1 h. In another beaker, x mg ( $x = 20, 40, 80$  mg) g- $\text{C}_3\text{N}_4$  was mixed in 80 ml aqueous solution containing 1 ml conc.  $\text{H}_2\text{SO}_4$  and 3 ml conc.  $\text{HNO}_3$  acid solutions, by sonication for 2 h. A white suspension was obtained after sonication. Then, the previously dispersed  $\text{ZnWO}_4$  solution was added to the g- $\text{C}_3\text{N}_4$  suspension. The suspension mixture was then placed on a hot plate at ~90 °C for 12 h with continuous magnetic stirring to evaporate the

solution to dryness. Finally, the yellowish product obtained was washed with 1:1 ethanol-water solution to remove excess acid and collected by centrifugation and dried at 60 °C for 6 h. The samples were denoted as g-C<sub>3</sub>N<sub>4</sub>/ZnWO<sub>4</sub> -0.25, -0.50, -1 (the notation as per g-C<sub>3</sub>N<sub>4</sub> concentration in mg/ml).

Ag nanoparticles were prepared with sodium borohydride (NaBH<sub>4</sub>) as a reducing agent and sodium citrate as a stabilizer.<sup>2</sup> Briefly, 0.5 ml 0.01 (M) aqueous AgNO<sub>3</sub> solution was mixed with 20 ml 1 mM tri-sodium citrate with magnetic stirring. After 20 minutes, 0.5 ml 0.01 (M) NaBH<sub>4</sub> solution was added to this solution under vigorous magnetic stirring at ambient temperature, resulting in a dark yellow-colored solution, indicating the formation of spherical Ag NPs. All the experiments were performed in a clean atmosphere to avoid contamination which may interfere with the toxicity of the nanoparticles.

As prepared ZnWO<sub>4</sub> NPs were first dispersed in 40 ml water and the suspension was stirred for 30 minutes at 60 °C in an inert atmosphere. To this suspension, the freshly prepared Ag NPs were injected. After 15 minutes, the final mixture was heated at 90 °C for 30 minutes. The grayish Ag/ZnWO<sub>4</sub> nanocomposite was collected by centrifugation and washed with water and dried at 60 °C for 4 h.

To prepare g-C<sub>3</sub>N<sub>4</sub>/Ag/ZnWO<sub>4</sub> nanocomposite, first, g-C<sub>3</sub>N<sub>4</sub> was sonicated for 2 h in a beaker to disperse in 40 ml water containing concentrated 1 ml H<sub>2</sub>SO<sub>4</sub> and 3 ml HNO<sub>3</sub>. Another solution of Ag/ZnWO<sub>4</sub> was prepared by ultra-sonication in 20 ml water. To the previous solution of g-C<sub>3</sub>N<sub>4</sub>, the second solution was added and stirred till evaporated to dryness, keeping a constant temperature of 90°C. A pale yellowish crude product appeared. To obtain the pure desired product the excess g-C<sub>3</sub>N<sub>4</sub> and the surfactant were eliminated by annealing at 300 °C for 1 h in an N<sub>2</sub> atmosphere.

**Sample Characterization:** The phases and crystallinity of the synthesized nanomaterials were determined by X-ray diffraction. X-ray scans of the samples were recorded from 5° to 60° 2θ by a Philips PW 1140 parallel beam X-ray diffractometer with monochromatic CuKα radiation (λ=1.540598 Å) at room temperature. To observe the surface morphology of the materials, high-resolution transmission electron microscopy (HRTEM) was performed at 200 kV by a TEM-JEOL JEM-2100. Field emission scanning electron microscopy (FESEM) and elemental

compositions by energy dispersive spectrometry (EDS) was carried out using a 20 kV FE-SEM, JEOL JSM 7100F. X-ray photoelectron spectroscopy (XPS) was executed with a Perkin-Elmer Physical Electronics 5600 spectrometer to confirm the existence of Ag(0) in the composite. The ASAP 2010 surface area (BET isotherm) analyzer was used to examine the N<sub>2</sub> adsorption/desorption characteristics. JASCO V-630 UV-Vis spectrophotometer was used to investigate absorption spectra at room temperature of the materials and the photoluminescence (PL) applications and lifetime measurements were carried out with a Horiba Fluorolog instrument.

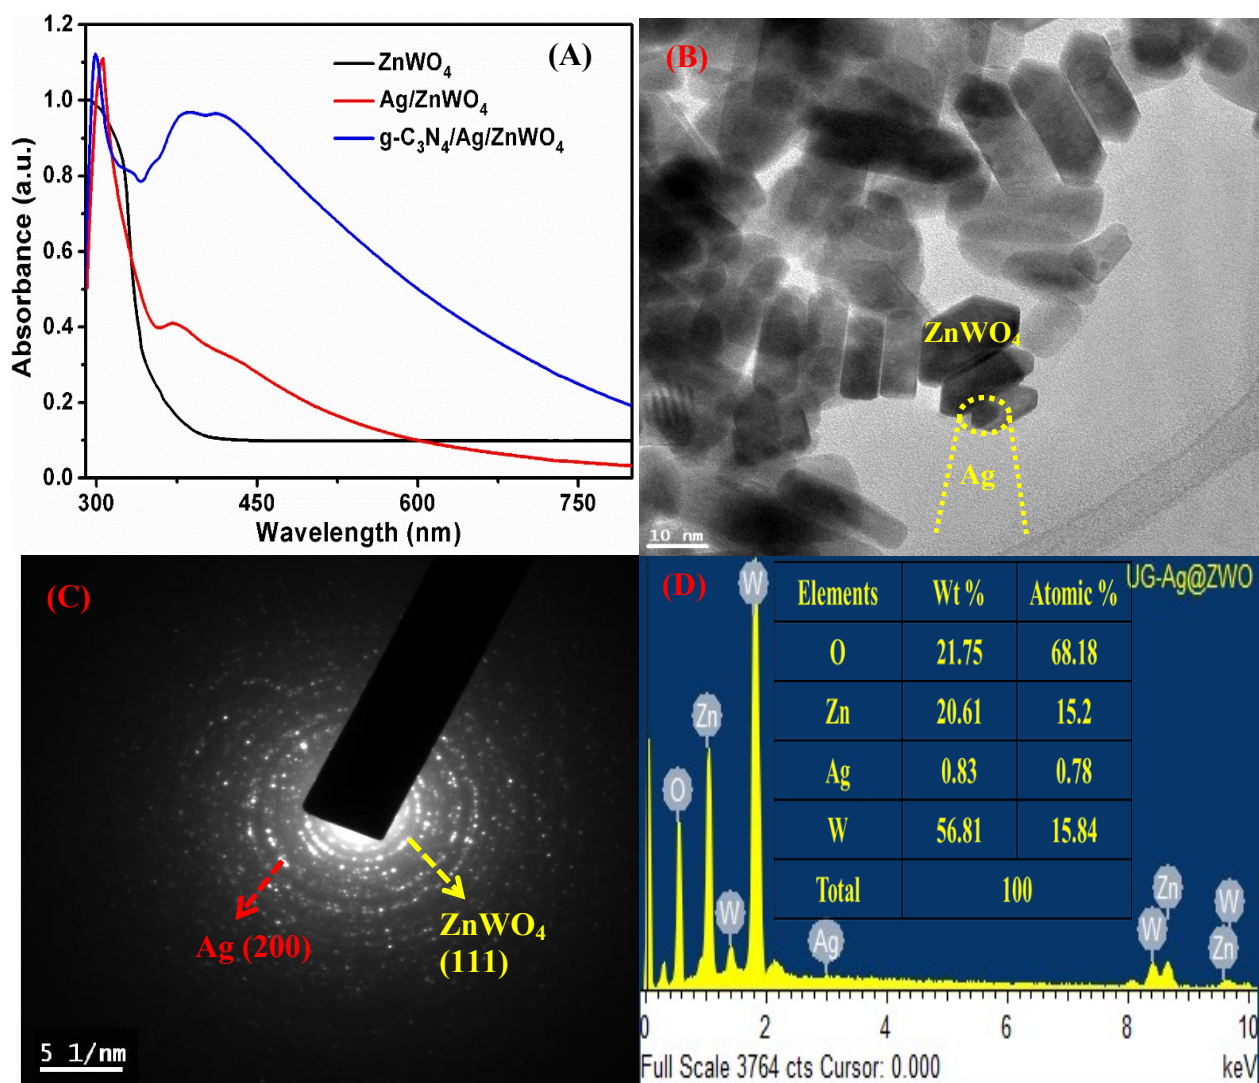

**Figure S1:** UV-Vis spectroscopy of pure ZnWO<sub>4</sub>, Ag/ZnWO<sub>4</sub> and g-C<sub>3</sub>N<sub>4</sub>/Ag/ZnWO<sub>4</sub> (A); TEM image (B), SAED pattern (C), and EDX (D) of Ag/ZnWO<sub>4</sub>.

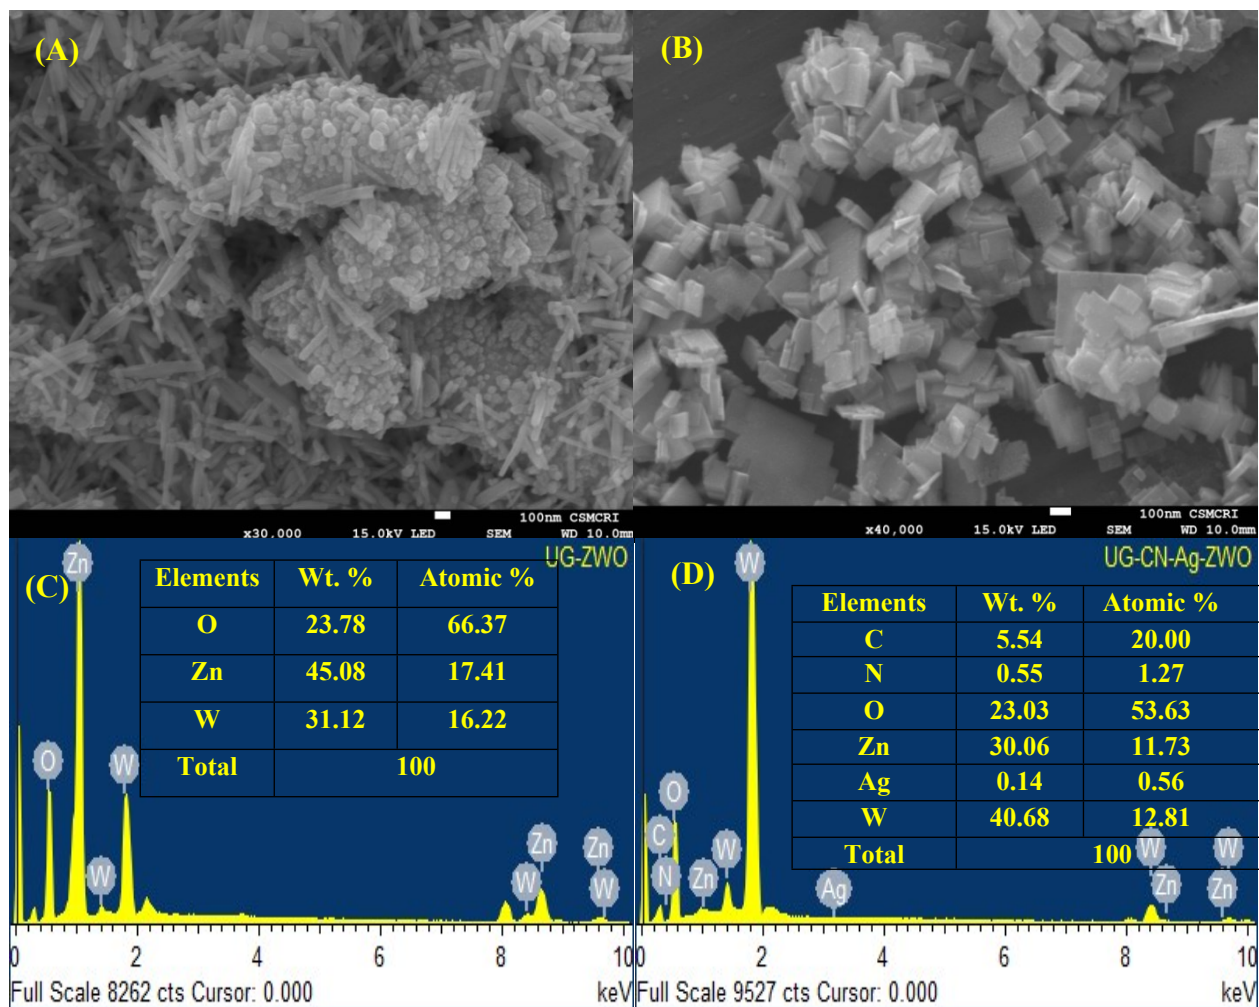

**Figure S2:** (A) FESEM and (C) EDS results of ZnWO<sub>4</sub> nanorods and (B) FESEM and (D) EDS results of g-C<sub>3</sub>N<sub>4</sub>/Ag/ZnWO<sub>4</sub> square nanoplates.

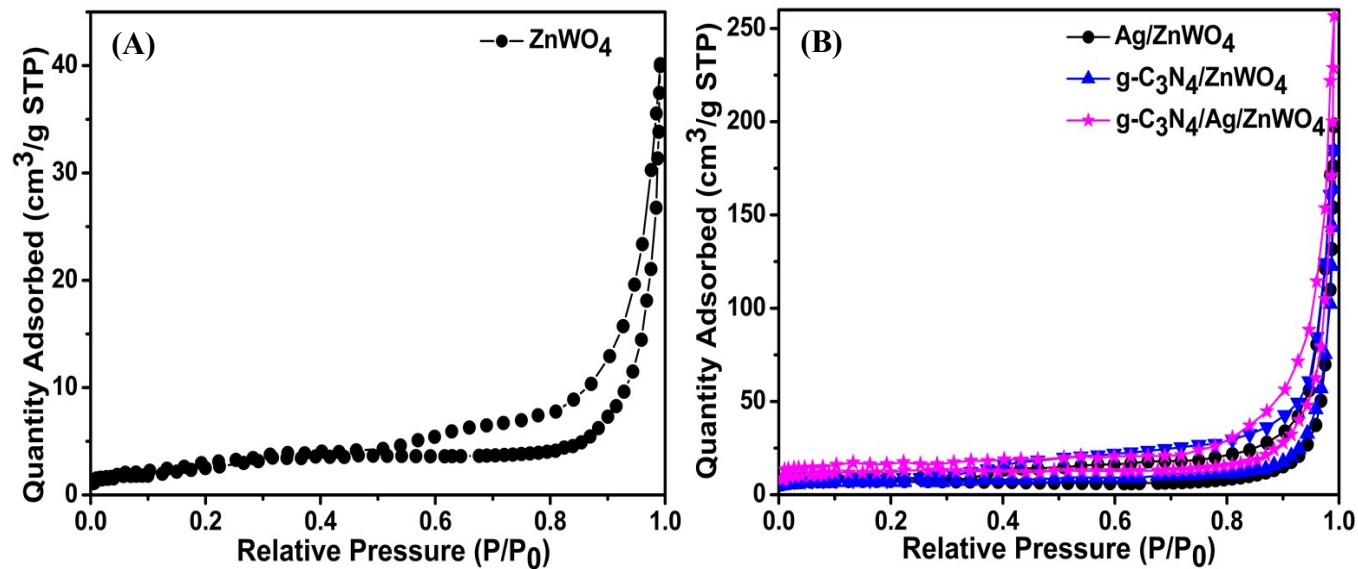

**Figure S3:** (A) BET-isotherms of ZnWO<sub>4</sub> and (B) Ag and g-C<sub>3</sub>N<sub>4</sub> composited ZnWO<sub>4</sub>, respectively.

**Table S1:** Comparison of the BET surface areas with ICP data of pure and hybrid ZnWO<sub>4</sub> nanomaterials

| Materials                                             | Weight % of Ag | Atomic Ratio of Ag/Zn | Surface Area (m <sup>2</sup> /g) |
|-------------------------------------------------------|----------------|-----------------------|----------------------------------|
| ZnWO <sub>4</sub>                                     | —              | —                     | 29.2                             |
| Ag/ZnWO <sub>4</sub>                                  | 2.86           | 0.051                 | 39.1                             |
| g-C <sub>3</sub> N <sub>4</sub> /ZnWO <sub>4</sub>    | —              | —                     | 43.8                             |
| g-C <sub>3</sub> N <sub>4</sub> /Ag/ZnWO <sub>4</sub> | 2.71           | 0.047                 | 55.7                             |

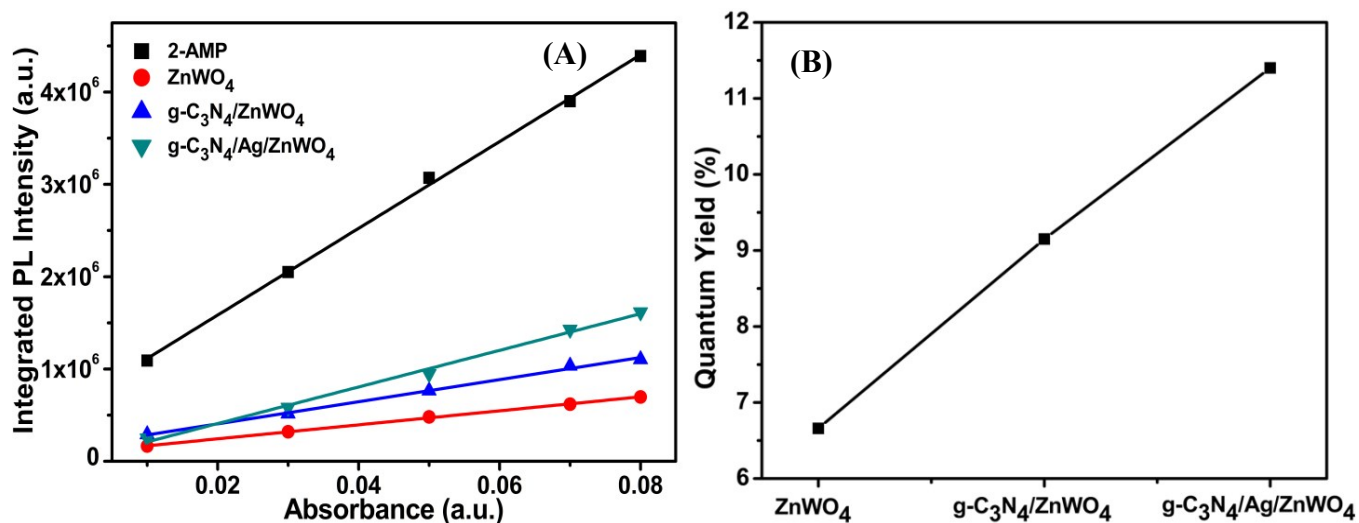

**Figure S4:** (A) Plots of PL Quantum Yields of various ZnWO<sub>4</sub> nanocomposites, (B) Plot of Quantum Yield percentage versus loading of g-C<sub>3</sub>N<sub>4</sub> and Ag NPs.

**Table S2:** Quantum yield comparison table for the various ZnWO<sub>4</sub> nanocomposites.

| Samples                                               | Gradient | $\Phi_x$ (%) | R <sup>2</sup> |
|-------------------------------------------------------|----------|--------------|----------------|
| 2-AMP                                                 | 46980000 |              | 0.9986         |
| ZnWO <sub>4</sub>                                     | 7580540  | 6.6          | 0.9991         |
| g-C <sub>3</sub> N <sub>4</sub> /ZnWO <sub>4</sub>    | 10407870 | 9.1          | 0.9933         |
| g-C <sub>3</sub> N <sub>4</sub> /Ag/ZnWO <sub>4</sub> | 12875340 | 11.4         | 0.9878         |

**Table S3:** Radiative Fluorescence Lifetime and Relative Percentage of Photoinduced Charge Carriers in pure ZnWO<sub>4</sub> and the various composited ZnWO<sub>4</sub>.

| Fluorescence NPs                                      | $\chi^2$ | $\alpha_1$ | $\tau_1$ (ns) | $\alpha_2$ | $\tau_2$ (ns) | $\alpha_3$ | $\tau_3$ (ns) | $\langle\tau\rangle$ (ns) |
|-------------------------------------------------------|----------|------------|---------------|------------|---------------|------------|---------------|---------------------------|
| ZnWO <sub>4</sub>                                     | 1.09     | 28.30      | 2.35          | 15.04      | 9.60          | 56.66      | 0.52          | <b>6.5</b>                |
| g-C <sub>3</sub> N <sub>4</sub> /ZnWO <sub>4</sub>    | 1.06     | 32.69      | 3.28          | 22.85      | 9.50          | 44.46      | 0.55          | <b>7.3</b>                |
| Ag/ZnWO <sub>4</sub>                                  | 1.02     | 38.14      | 3.90          | 22.70      | 11.25         | 39.16      | 0.84          | <b>8.1</b>                |
| g-C <sub>3</sub> N <sub>4</sub> /Ag/ZnWO <sub>4</sub> | 1.06     | 54.92      | 5.72          | 24.50      | 15.42         | 20.58      | 1.25          | <b>10.7</b>               |

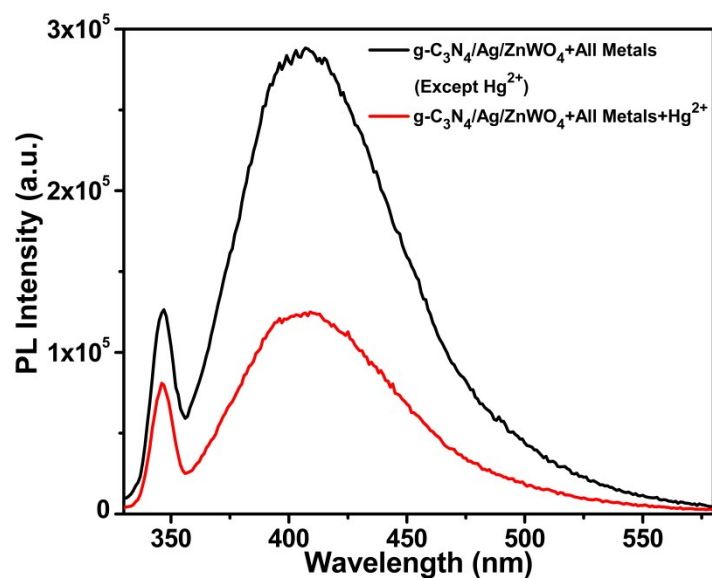

**Figure S5:** PL emission of  $g\text{-C}_3\text{N}_4/\text{Ag}/\text{ZnWO}_4$  in presence of  $\text{Hg}^{2+}$  and other metal ions ( $\lambda_{\text{ex}}=360$  nm,  $[\text{M}^{n+}]=1\text{mM}$ )  $\text{M}^{n+} = \text{Ca}^{2+}, \text{Cd}^{2+}, \text{Fe}^{2+}, \text{Co}^{2+}, \text{Cu}^{2+}, \text{K}^+, \text{Mn}^{2+}, \text{Ni}^{2+}, \text{Pb}^{2+}$  and  $\text{Hg}^{2+}$ .

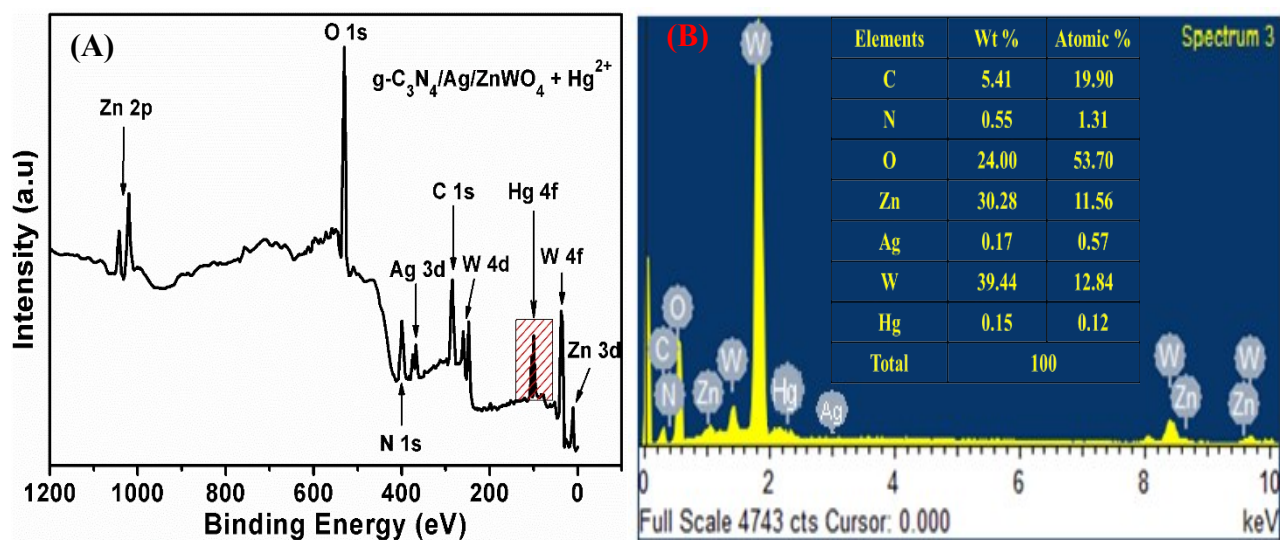

**Figure S6:** XPS analysis of  $g\text{-C}_3\text{N}_4/\text{Ag}/\text{ZnWO}_4$  after adding  $\text{Hg}(\text{II})$  salt in presence of other metal ions (A) overall scan; (B) EDX (inset EDX result) of  $g\text{-C}_3\text{N}_4/\text{Ag}/\text{ZnWO}_4$  in presence of  $\text{Hg}(\text{II})$  salt.



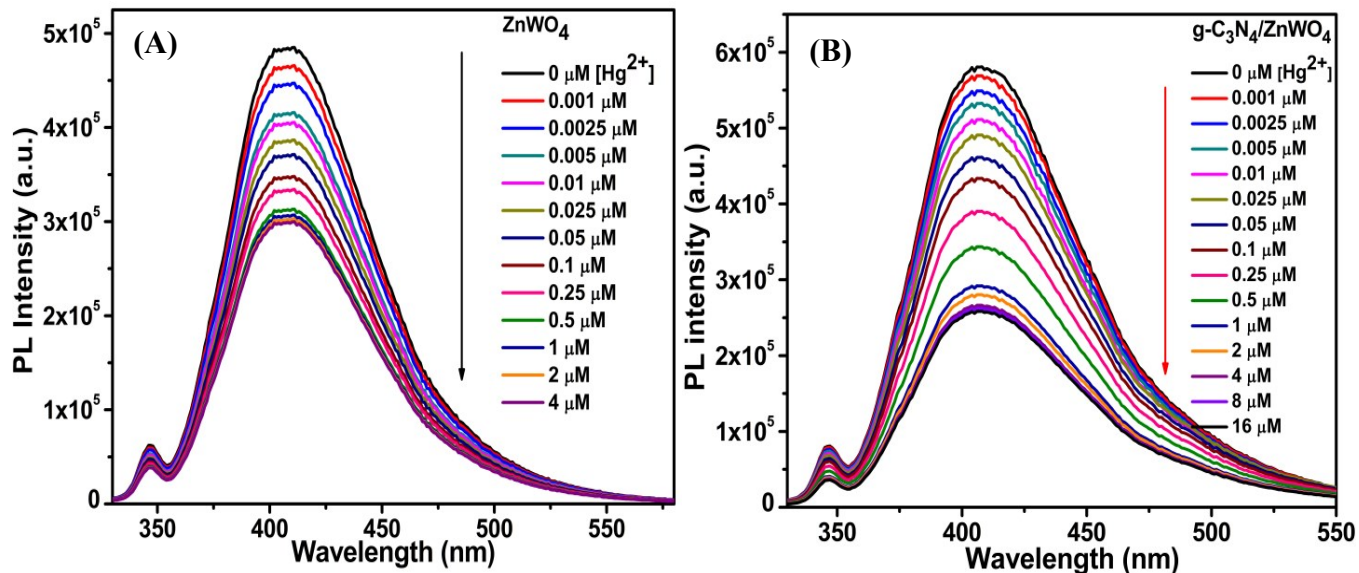

**Figure S7:** Quantitative detection of  $\text{Hg}^{2+}$  by photoluminescence in buffer (pH = 7.2) solutions containing (A)  $\text{ZnWO}_4$  and (B)  $\text{g-C}_3\text{N}_4/\text{ZnWO}_4$ .

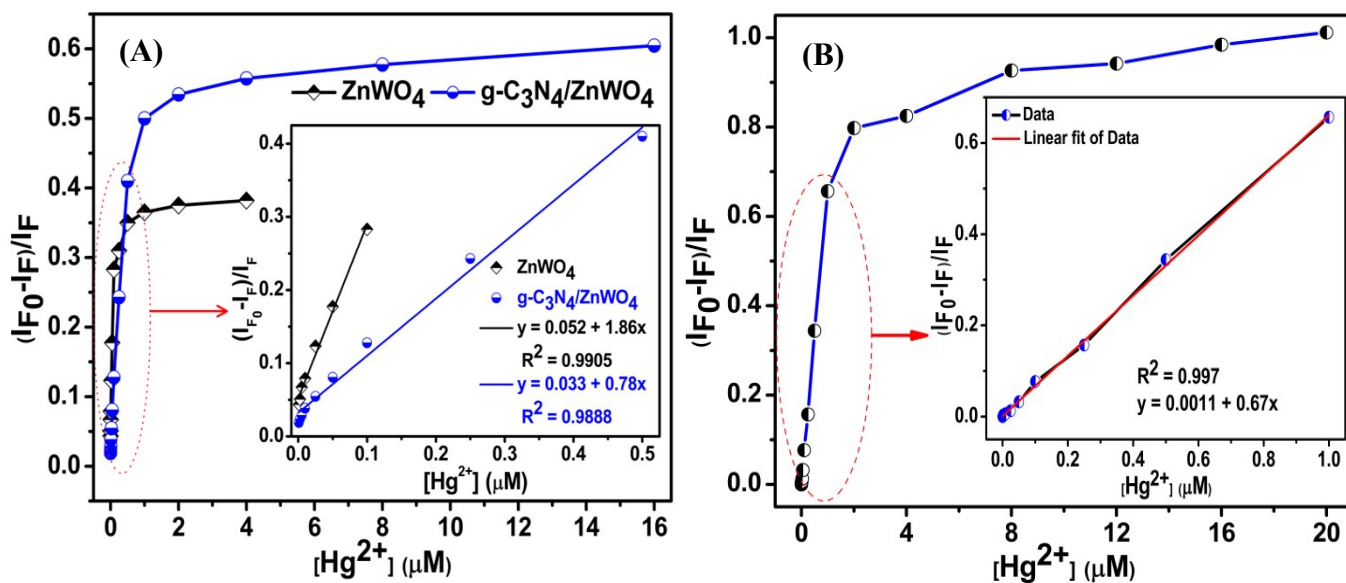

**Figure S8:** (A) Calibration curves of  $\text{ZnWO}_4$  (black curve) and  $\text{g-C}_3\text{N}_4/\text{ZnWO}_4$  (blue curve) for the detection of  $\text{Hg}^{2+}$  (inset contains linear plots of relative intensity vs. conc. of  $\text{Hg}^{2+}$ ). (B) Calibration curve of  $\text{g-C}_3\text{N}_4/\text{Ag}/\text{ZnWO}_4$  for  $\text{Hg}^{2+}$  sensing in tap water.

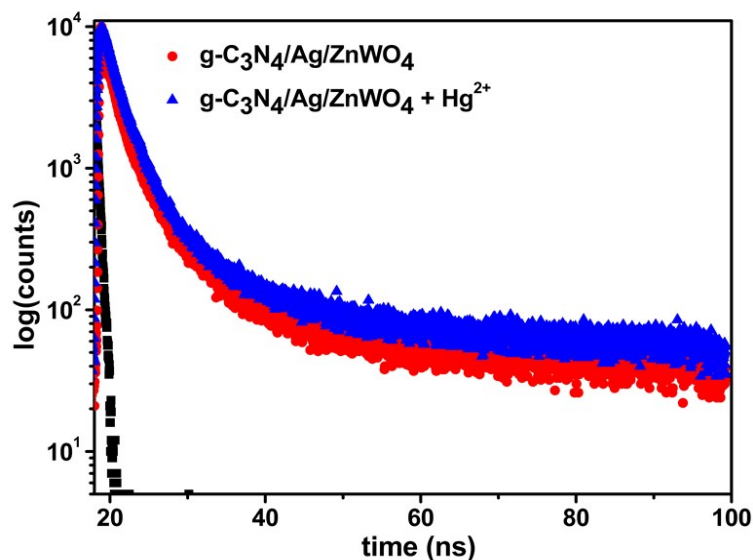

**Figure S9:** Lifetime measurement of  $g\text{-C}_3\text{N}_4/\text{Ag}/\text{ZnWO}_4$  nanocomposite before and after PL quenching.

**Table S4:** Summary of triple exponential fitting of time-resolved fluorescence of  $g\text{-C}_3\text{N}_4/\text{Ag}/\text{ZnWO}_4$  without and with the presence of  $\text{Hg}^{2+}$ .

| Fluorescence NPs                                                  | $\chi^2$ | $\alpha_1$ | $\tau_1(\text{ns})$ | $\alpha_2$ | $\tau_2(\text{ns})$ | $\alpha_3$ | $\tau_3(\text{ns})$ | $\langle\tau\rangle$<br>(ns) |
|-------------------------------------------------------------------|----------|------------|---------------------|------------|---------------------|------------|---------------------|------------------------------|
| $g\text{-C}_3\text{N}_4/\text{Ag}/\text{ZnWO}_4$                  | 1.06     | 54.92      | 5.72                | 24.50      | 15.42               | 20.58      | 1.25                | <b>10.7</b>                  |
| $g\text{-C}_3\text{N}_4/\text{Ag}/\text{ZnWO}_4 + \text{Hg}^{2+}$ | 1.0007   | 52.43      | 6.10                | 24.46      | 16.08               | 23.11      | 0.82                | <b>11.3</b>                  |

From Figure S6, it is well justified that an increase in the lifetime of the carriers of  $g\text{-C}_3\text{N}_4/\text{Ag}/\text{ZnWO}_4$  takes place after the addition of  $\text{Hg}^{2+}$  ions. The average lifetime of the carriers was calculated using equation (1). From Table S4 it is clear that the fluorescence lifetime is fitted with three exponentials. The three different decay lifetimes of  $g\text{-C}_3\text{N}_4/\text{Ag}/\text{ZnWO}_4$  are  $\tau_1 = 5.72$  ns,  $\tau_2 = 15.42$  ns, and  $\tau_3 = 1.25$  ns, respectively with an average fluorescence lifetime  $\langle\tau\rangle = 10.7$  ns. On addition of  $10 \mu\text{M}$   $\text{Hg}^{2+}$ , a triple exponential decay was observed with lifetimes of  $\tau_1 = 6.10$  ns,  $\tau_2 = 16.08$  ns and  $\tau_3 = 0.82$  ns, respectively with an average lifetime  $\langle\tau\rangle = 11.3$  ns. Thus the average time-resolved fluorescence of  $g\text{-C}_3\text{N}_4/\text{Ag}/\text{ZnWO}_4$  increased by about **0.6 ns** after quenching of PL emission. The enhanced decay lifetime of  $g\text{-C}_3\text{N}_4/\text{Ag}/\text{ZnWO}_4$  on the

addition of  $\text{Hg}^{2+}$  can be attributed to the presence of the heavy metal ion effect. This increase in a lifetime can be explained based on a better intersystem crossing from the excited singlet state to the triplet state. Based on the static quenching mechanism, these observations are indicative of ground-state complex formation between  $\text{Hg}^{2+}$  and  $\text{g-C}_3\text{N}_4/\text{Ag}/\text{ZnWO}_4$ ; therefore, no decrease in fluorescence lifetime would be observed, as expected for a dynamic quenching process.<sup>3</sup> On addition of  $\text{Hg}^{2+}$  to the  $\text{g-C}_3\text{N}_4/\text{Ag}/\text{ZnWO}_4$  nanocomposite the time-resolved fluorescence of each of the component, as well as the average lifetime also increased, which can be explained based on metallophilic effect with Ag by the formation of Ag-Hg nanoalloy<sup>4</sup> (as expected from our case in XPS analysis figure 8A). Therefore, it can be concluded that the increased average lifetime indicates a more populated upper excited state of the second component during the grafting of  $\text{Hg}^{2+}$  with the nanocomposite.

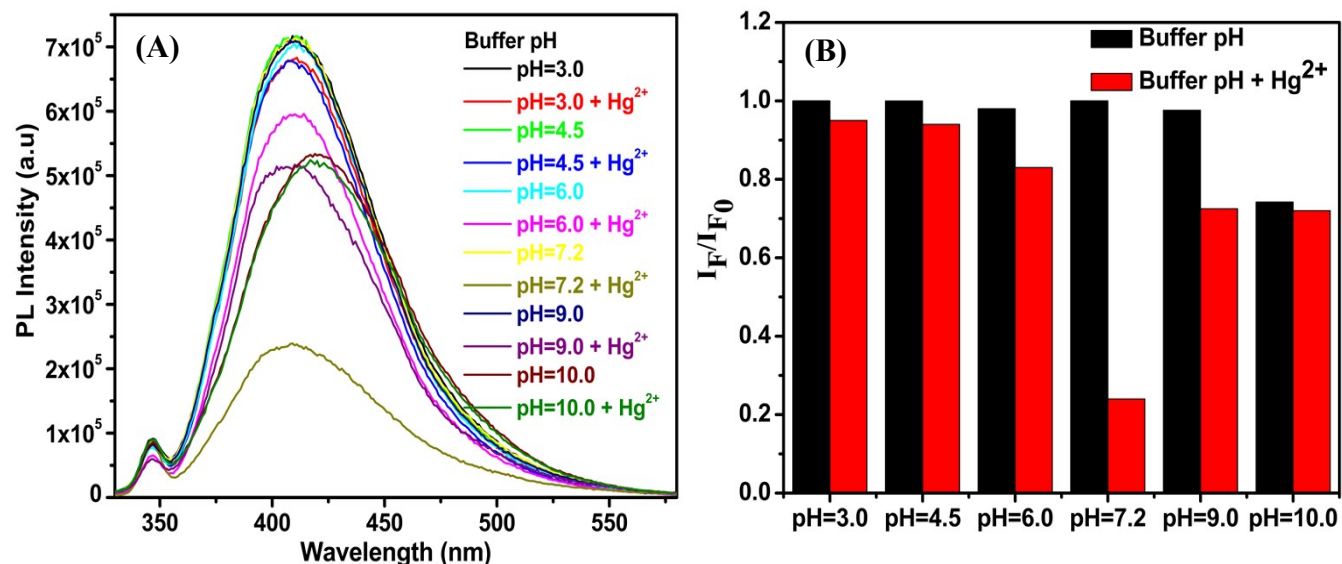

**Figure S10:** (A) PL emission spectra of  $\text{g-C}_3\text{N}_4/\text{Ag}/\text{ZnWO}_4$  in different buffer pH and presence of  $\text{Hg}^{2+}$  at the respective pH, (B) Corresponding histograms of respective PL spectra.

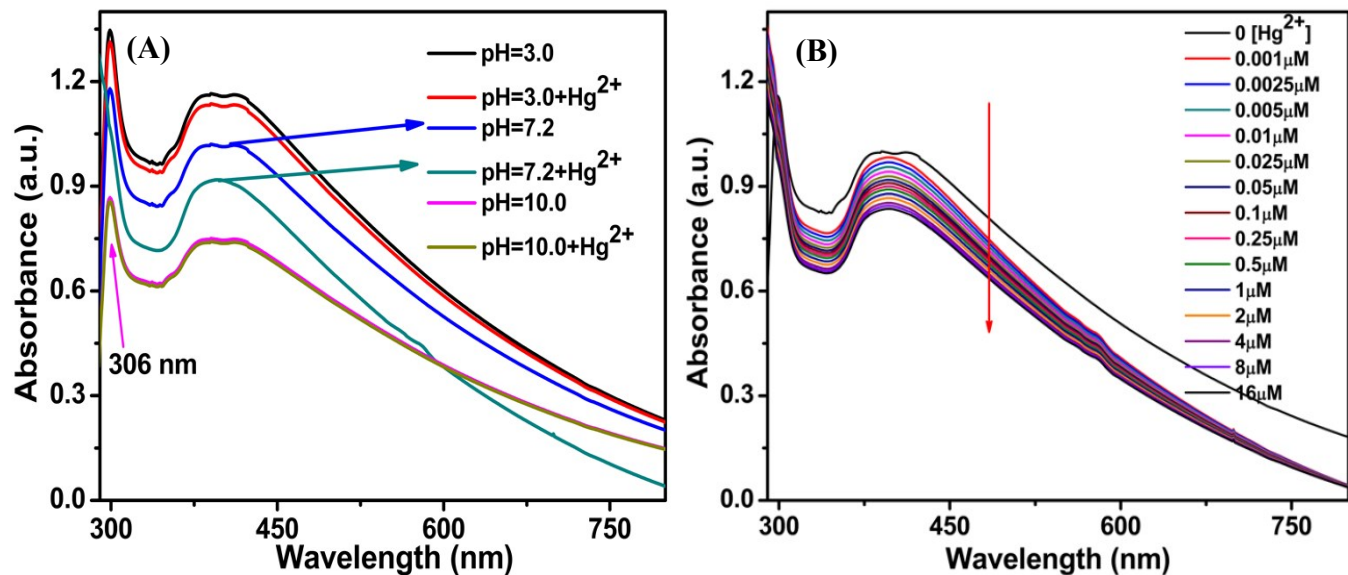

**Figure S11:** (A) UV-visible spectra of suspended g-C<sub>3</sub>N<sub>4</sub>/Ag/ZnWO<sub>4</sub> in solution at different pH values, pH-3.0, pH-7.2, pH-10.0, and corresponding spectra after addition of 20 μL of 10 μM Hg<sup>2+</sup>. (B) UV-visible spectra of g-C<sub>3</sub>N<sub>4</sub>/Ag/ZnWO<sub>4</sub> in presence of different concentrations of Hg<sup>2+</sup> ions.

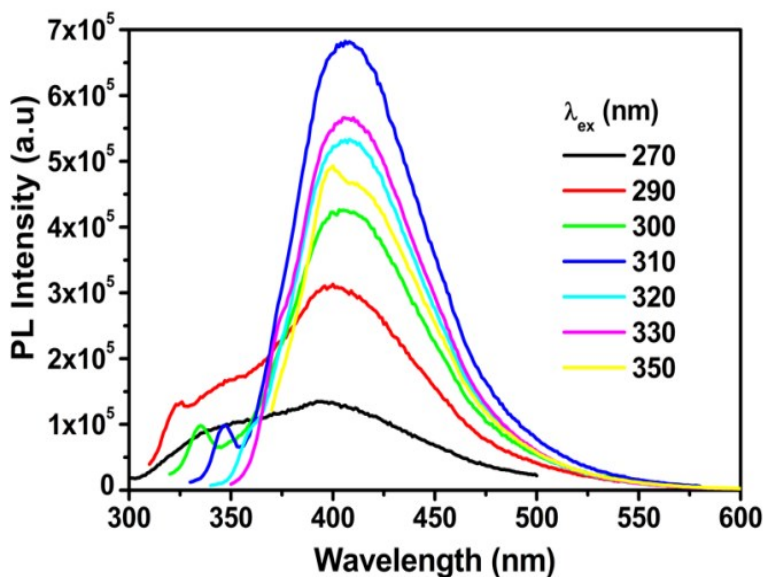

**Figure S12:** PL emission spectra of g-C<sub>3</sub>N<sub>4</sub>/Ag/ZnWO<sub>4</sub> for different excitation wavelengths.

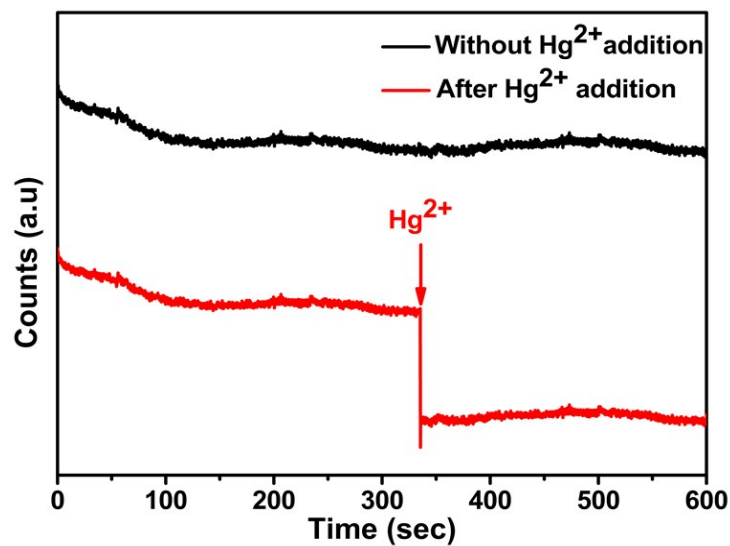

**Figure S13:** Time-resolved fluorescence stability test of  $g\text{-C}_3\text{N}_4/\text{Ag}/\text{ZnWO}_4$  in the absence and presence of  $\text{Hg}^{2+}$ .

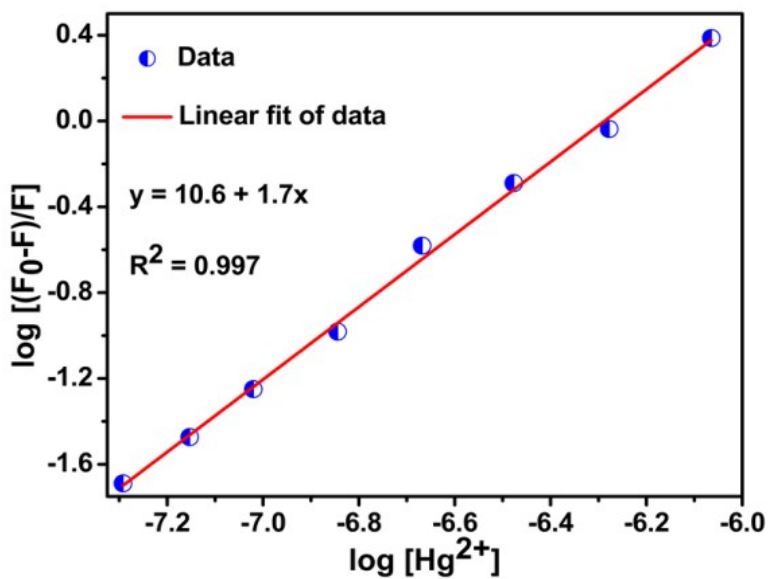

**Figure S14:** Binding constant and binding site calculation using PL data.

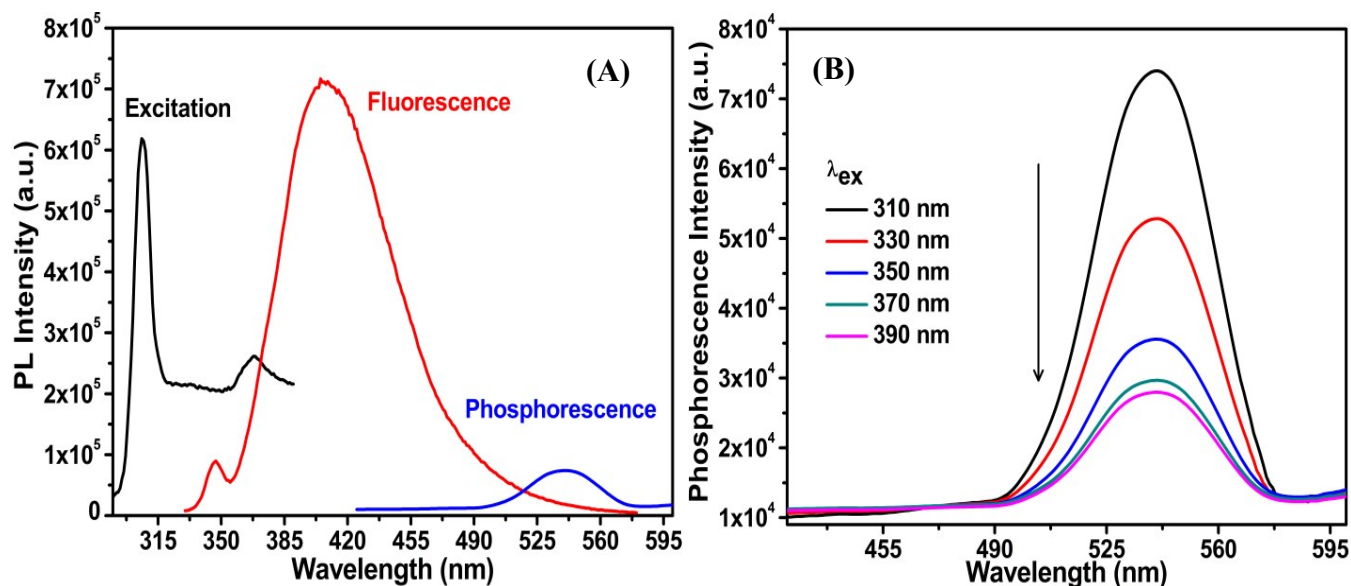

**Figure S15:** (A) PL excitation spectrum (black) and fluorescence emission (red) and phosphorescence (blue) emission spectra of g-C<sub>3</sub>N<sub>4</sub>/Ag/ZnWO<sub>4</sub> nanocomposite ( $\lambda_{ex}$  = 310 nm,  $\lambda_{emF}$  = 408 nm,  $\lambda_{emP}$  = 520 nm). (B) Change of phosphorescence intensity for different excitation wavelengths.

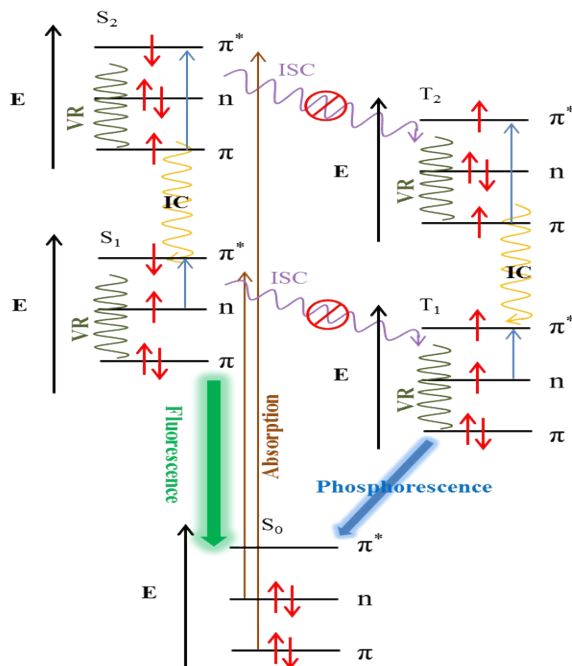

**Scheme S1:** Schematic representation of partial energy level diagram for PL in a molecular system for the explanation of Fluorescence and Room Temperature Phosphorescence (RTP) of g-C<sub>3</sub>N<sub>4</sub>/Ag/ZnWO<sub>4</sub>.

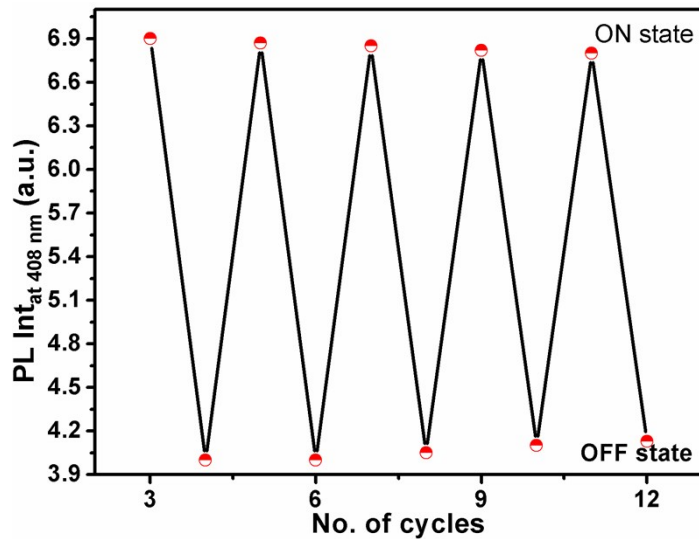

**Figure S16:** Recyclability test of g-C<sub>3</sub>N<sub>4</sub>/Ag/ZnWO<sub>4</sub> for the detection of Hg(II).

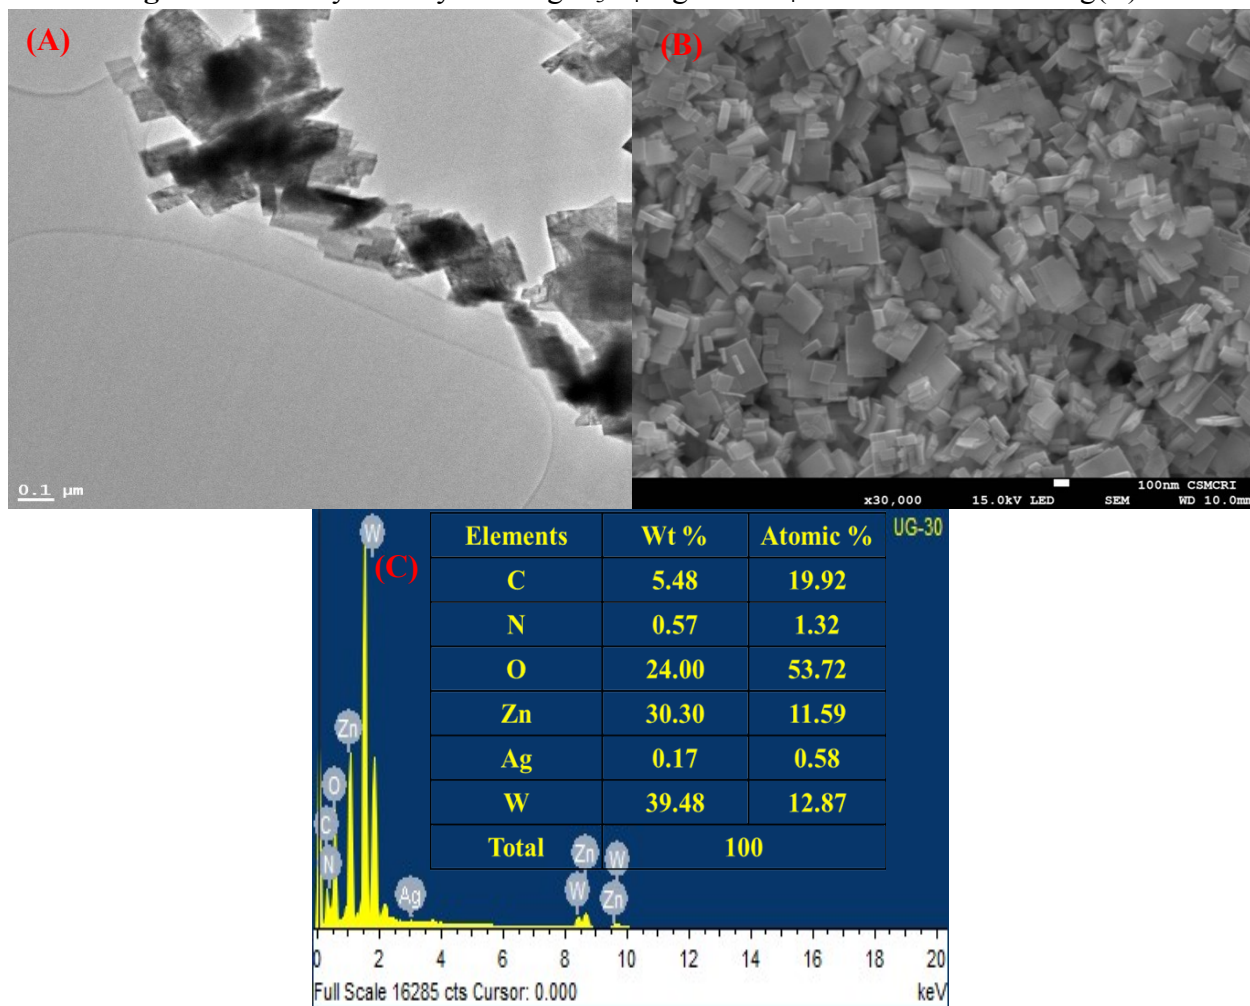

**Figure S17:** TEM image (A), FESEM (B), and EDX (C) of g-C<sub>3</sub>N<sub>4</sub>/Ag/ZnWO<sub>4</sub> after multiple cycles of the sensing.

**Table S5:** Comparison table of  $\text{Hg}^{2+}$  sensing efficiency for different materials obtained by Fluorescence Spectroscopy

| Fluorescence NPs                                        | Method                       | Detection limit                  | Linear range                         | Year | Reference        |
|---------------------------------------------------------|------------------------------|----------------------------------|--------------------------------------|------|------------------|
| DNA-AuNP                                                | Fluorescence                 | 25nM                             | 0.05-2.5 $\mu\text{M}$               | 2008 | 5                |
| CdS-encapsulated DNA                                    | Fluorescence                 | 4.3nM at 50°C<br>8.6nM at 30°C   | 0.04-13 $\mu\text{M}$                | 2009 | 6                |
| Fluorescent Ag clusters                                 | Fluorescence                 | 10nM                             | 10nM-5 $\mu\text{M}$                 | 2011 | 7                |
| Au@Ag core-shell nanoparticles                          | Fluorescence                 | 9nM                              | 10-450nM                             | 2011 | 8                |
| Lysozyme-stabilized Ag nanoclusters                     | Fluorescence                 | 0.6 $\mu\text{M}$                | 1-15 $\mu\text{M}$                   | 2012 | 9                |
| CNP                                                     | Fluorescence                 | 2.3nM                            | 5-10nM                               | 2012 | 10               |
| CDs                                                     | Fluorescence                 | 4.2nM                            | 0-3 $\mu\text{M}$                    | 2012 | 11               |
| Ag NPR                                                  | Colorimetric                 | 3.3nM                            | 10-500nM                             | 2013 | 12               |
| Functionalized Au NPs                                   | Colorimetric                 | 2.9nM                            | 10nM-1.5 $\mu\text{M}$               | 2014 | 13               |
| Perylene based Au NPs                                   | Fluorescence                 | 5nM                              | 0-3.5 $\mu\text{M}$                  | 2016 | 14               |
| Triangular Ag Nanoprism                                 | Colorimetric                 | 30nM (naked eye)<br>3nM (UV-Vis) | 25-800nM                             | 2016 | 4                |
| NDPP                                                    | Fluorescence                 | 11nM                             | 0-4 $\mu\text{M}$                    | 2017 | 15               |
| AuNPs/CDs                                               | Colorimetric                 | 7.5nM                            | 10-300nM                             | 2018 | 16               |
| Calixarene-capped Ag NPs                                | Colorimetric<br>Amperometric | 0.5nM                            | 20nM-0.9 $\mu\text{M}$               | 2019 | 17               |
| <b>g-C<sub>3</sub>N<sub>4</sub>/Ag/ZnWO<sub>4</sub></b> | <b>Fluorescence</b>          | <b>0.23nM</b>                    | <b>0nM-2<math>\mu\text{M}</math></b> |      | <b>This Work</b> |

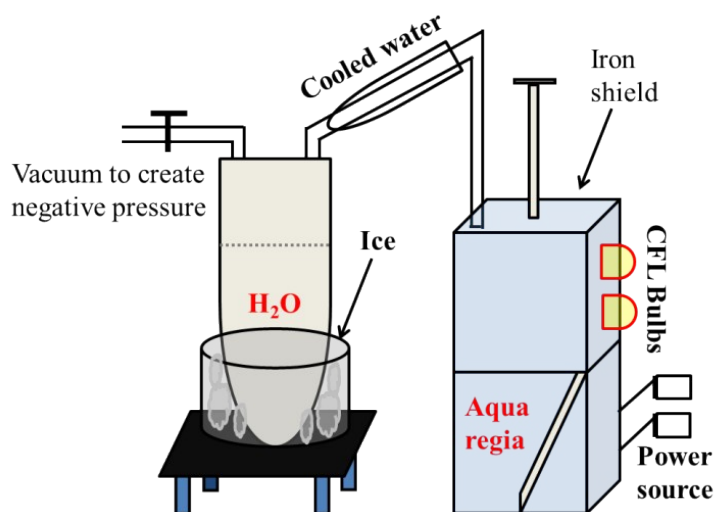

**Figure S18:** Schematic representation of the extraction of  $\text{Hg}^{2+}$  from CFL bulbs.



**Extraction of mercury from waste CFL bulbs:**

Generally, the CFL bulbs contain 4mg of Hg. This mercury was extracted by a chemical method of the efficacy of broken glass, as shown in Figure S18. The waste CFL bulbs were fixed to the closed iron shield container and were crushed by the piston. The broken glass pieces were dropped on to a solution of aqua regia present in a chamber in the vessel and boiled at  $\sim 380^{\circ}\text{C}$  for 30 min. The system was vacuumed to create a negative pressure so that the vapor was then condensed to dissolve in water. The stock solution of mercury was collected and performed PL analysis.

## REFERENCES:

1. F. Wang, W. Li, S. Gu, H. Li, X. Liu, M. Wang, *ACS sustainable chemistry & engineering*, 2016, **4**, 6288-6298.
2. B. Ghaemi, E. Shaabani, R. Najafi-Taher, S. J. Nodooshan, A. Sadeghpour, S. Kharrazi, A. Amani, *ACS Applied Materials & Interfaces*, 2018, **10**, 24370-24381.
3. K. Patir, S. K. Gogoi, *ACS Sustainable Chem. Eng.*, 2018, **6**, 1732-1743.
4. N. Chen, Y. Zhang, H. Liu, X. Wu, Y. Li, L. Miao, Z. Shen, A. Wu, *ACS Sens.*, 2016, **1**, 521–527.
5. C.-W. Liu, C.-C. Huang, H.-T. Chang, *Langmuir*, 2008, **24**, 8346-8350.
6. Y. Long, D. Jiang, X. Zhu, J. Wang, F. Zhou, *Anal. Chem.*, 2009, **81**, 2652-2657.
7. C. Guo, J. Irudayaraj, *Anal. Chem.*, 2011, **83**, 2883-2889.
8. S. Guha, S. Roy, A. Banerjee, *Langmuir*, 2011, **27**, 13198-13205.
9. T. Zhou, Y. Huang, W. Li, Z. Cai, F. Luo, C. J. Yang, X. Chen, *Nanoscale*, 2012, **4**, 5312-5315.
10. L. Zhou, Y. Lin, Z. Huang, J. Ren, X. Qu, *Chem. Commun.*, 2012, **48**, 1147-1149.
11. W. Lu, X. Qin, S. Liu, G. Chang, Y. Zhang, Y. Luo, A. M. Asiri, A. O. Al-Youbi, X. Sun, *Anal. Chem.*, 2012, **84**, 5351-5357.
12. L. Chen, X. Fu, W. Lu, L. Chen, *ACS Appl. Mater. Interfaces*, 2013, **5**, 284–290.
13. L. Chen, J. Li, L. Chen, *ACS Appl. Mater. Interfaces*, 2014, **6**, 15897-15904.
14. J. Li, J. Chen, Y. Chen, Y. Li, S.A. Shahzad, Y. Wang, M. Yang, C. Yu, *Analyst*, 2016, **141**, 346–351.
15. K. Nie, B. Dong, H. Shi, Z. Liu, B. Liang, *Anal. Chem.*, 2017, **89**, 2928-2936.
16. F. Wang, J. Sun, Y. Lu, X. Zhang, P. Song, Y. Liu, *Analyst*, 2018, **143**, 4741–4746.
17. G. Vyas, S. Bhatt, P. Paul, *ACS Omega*, 2019, **4**, 3860-3870.
